# Supplementary material for: Antioxidant Potential of Resveratrol as the Result of Radiation Exposition
Source: MDPI journal article supplement (doi:10.3390/antiox11112097), 2022-10-24
Supplement: s1 [file s1]

# Antioxidant Potential of Resveratrol as the Result of Radiation Exposition

Natalia Rosiak <sup>1</sup>, Judyta Cielecka-Piontek <sup>1</sup>, Robert Skibiński <sup>2</sup>, Kornelia Lewandowska <sup>3</sup>,  
Waldemar Bednarski <sup>3</sup> and Przemysław Zalewski <sup>1,\*</sup>

<sup>1</sup> Department of Pharmacognosy, Poznan University of Medical Sciences, Rokietnicka 3, 60-806 Poznań, Poland

<sup>2</sup> Department of Medicinal Chemistry, Medical University of Lublin, Jaczewskiego 4, 20-090 Lublin, Poland

<sup>3</sup> Institute of Molecular Physics, Polish Academy of Sciences, Smoluchowskiego 17, 60-179, Poznań, Poland

\* Correspondence: pzalewski@ump.edu.pl

## Fourier Transform Infrared Spectroscopy (FT-IR) analysis

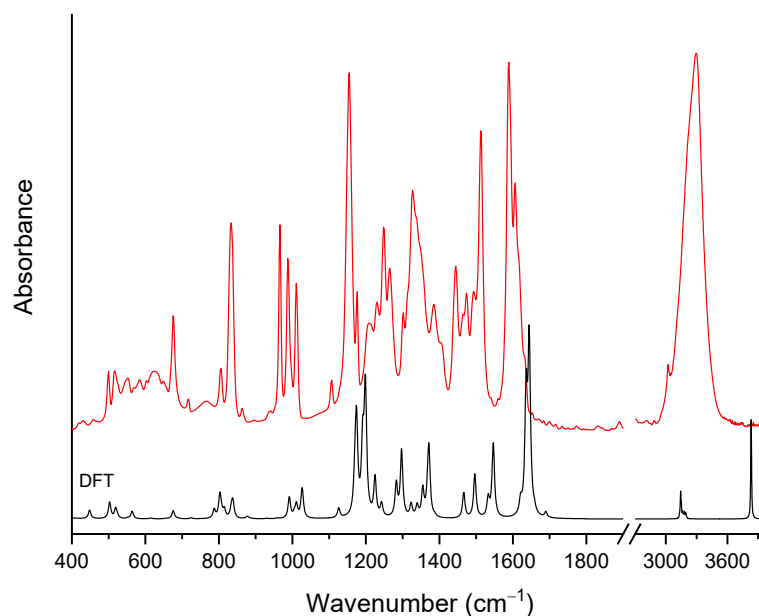

**Figure S1.** Calculation (black-DFT) and experimental (red) IR absorption spectra of resveratrol at room temperature.

**Table S1.** Selected characteristic vibronic features of resveratrol theory with application of 6-31G(d,p) basis and experiment bands of resveratrol. s-stretching, b-bending, r-rocking, oop-outside of the plane.

| Calculation<br>(cm <sup>-1</sup> ) | Experimental<br>(cm <sup>-1</sup> ) | Band Assignment                                                                                                                                    |
|------------------------------------|-------------------------------------|----------------------------------------------------------------------------------------------------------------------------------------------------|
| 504                                | 499                                 | Def. all molecule                                                                                                                                  |
| 520                                | 515                                 | Def. oop hydroxyphenyl group + def. dihydroxyphenyl group                                                                                          |
| 565                                | 550                                 | Rocking dihydroxyphenyl group                                                                                                                      |
| 677                                | 676                                 | C-H oop in dihydroxyphenyl group                                                                                                                   |
| 788                                | 768                                 | C-H oop in dihydroxyphenyl group                                                                                                                   |
| 803                                | 805                                 | C-H oop                                                                                                                                            |
| 839                                | 833                                 | C-H oop                                                                                                                                            |
| 877                                | 863                                 | Breathing hydroxyphenyl group                                                                                                                      |
| 992                                | 966                                 | C-H oop in ethenyl group                                                                                                                           |
| 1011                               | 987                                 | C-C s between dihydroxyphenyl and ethenyl groups + C-C-C b in dihydroxyphenyl group                                                                |
| 1027                               | 1010                                | C-O s in dihydroxyphenyl group + C-C s between dihydroxyphenyl and ethenyl groups + C-C-C b in dihydroxyphenyl group + rocking hydroxyphenyl group |
| 1127                               | 1107                                | C-H r in ethenyl group + C-O-H b                                                                                                                   |
| 1175                               | 1152                                | C-O s in dihydroxyphenyl group + C-H r in dihydroxyphenyl group + C-C s between dihydroxyphenyl and ethenyl groups                                 |
| 1199                               | 1176                                | C-O-H b + C-H r                                                                                                                                    |
| 1225                               | 1247                                | O-H r in dihydroxyphenyl group + C-H r in dihydroxyphenyl group                                                                                    |
| 1243                               | 1264                                | C-H r + C-C s between hydroxyphenyl and ethenyl groups                                                                                             |
| 1284                               | 1302                                | C-C s between hydroxyphenyl and ethenyl groups + C-H r                                                                                             |
| 1298                               | 1326                                | C-O s in hydroxyphenyl group + C-H r in hydroxyphenyl group                                                                                        |
| 1356                               | 1385                                | C-H r in ethenyl groups                                                                                                                            |
| 1372                               | 1444                                | C-O s in dihydroxyphenyl group + C-C s in dihydroxyphenyl group + C-O-H b in dihydroxyphenyl group C-H r in dihydroxyphenyl and ethenyl groups     |
| 1467                               | 1465                                | C-C s + C-O-H b + C-H r in hydroxyphenyl group                                                                                                     |
| 1497                               | 1474                                | C-O s + C-C s + C-O-H b in dihydroxyphenyl group                                                                                                   |
| 1534                               | 1493                                | C-O s in dihydroxyphenyl group + C-C s between dihydroxyphenyl and ethenyl groups + C-H r in dihydroxyphenyl group                                 |
| 1547                               | 1513                                | C-O s + C-H r in hydroxyphenyl group                                                                                                               |
| 1637                               | 1588                                | C=C s + C-O-H b in dihydroxyphenyl and hydroxyphenyl groups                                                                                        |
| 1644                               | 1606                                | C=C s                                                                                                                                              |
| 1690                               | 1636                                | C=C s in ethenyl group                                                                                                                             |
| 3134                               | 3023                                | C-H s                                                                                                                                              |
| 3203                               | 3293                                | C-H s                                                                                                                                              |
| 3834                               | 3400                                | O-H s                                                                                                                                              |

The IR absorption spectrum is characterized by many bands. Not taking the band at 3293 cm<sup>-1</sup> into account, that is related to the stretching vibration of the C-H bonds, the bands at 1152 and 1588 cm<sup>-1</sup> are the most intense in the spectrum. The first of them is mainly corresponding to the stretching vibration of the C-O bonds in dihydroxyphenyl group, but they have an additional component related to the rocking vibration of the C-H bonds in dihydroxyphenyl group, and stretching vibration of the C-C bond between dihydroxyphenyl and ethenyl groups. While the second band is associated

with the stretching vibration of the C=C bonds and bending vibration of the C-O-H bonds in dihydroxyphenyl and hydroxyphenyl groups. The bands related to the stretching vibration of the C-O bonds in dihydroxyphenyl group are also observed at 1010, 1352, 1474 and 1493  $\text{cm}^{-1}$ . The first of them is also corresponding to the stretching vibration of the C-C bond between dihydroxyphenyl and ethenyl groups and bending vibration of the C-C-C bonds in dihydroxyphenyl group and rocking hydroxyphenyl group. The second have also additional components related to the stretching vibration of the C-C bond, bending vibration of the C-O-H bonds in dihydroxyphenyl group and rocking vibration of the C-H bonds in dihydroxyphenyl and ethenyl groups. And the band at 1474  $\text{cm}^{-1}$  is also related to the stretching vibration of the C-C and bending vibration of the C-O-H bonds in dihydroxyphenyl group. The last band 1493  $\text{cm}^{-1}$  is related to the stretching vibration of the C-C bonds between dihydroxyphenyl and ethenyl groups and rocking vibration of the C-H bonds in dihydroxyphenyl group too. The bands at 1210 and 1385  $\text{cm}^{-1}$  are associated with the rocking vibration of the O-H and C-H in dihydroxyphenyl group and stretching vibration of the C-C, C-O and bending vibration of the C-O-H bonds in dihydroxyphenyl group, respectively. With the rocking vibration of the C-H and O-H bonds in dihydroxyphenyl group is also related the band at 1302  $\text{cm}^{-1}$ . For the hydroxyphenyl group are characteristic the bands at 1264, 1444 and 1513  $\text{cm}^{-1}$ . The first and last of them is associated with stretching vibration of the C-O bonds and rocking vibration of the C-H bonds. The second is corresponding to the stretching vibration of the C-C, bending vibration of the C-O-H and rocking vibration of the C-H bonds. In the IR absorption spectrum are also observed the bonds related to the stretching vibration of the C-C bond between hydroxyphenyl and ethenyl groups, which are located at 1229 and 1247  $\text{cm}^{-1}$ . Whereas, the most characteristic bond for the ethenyl group is related to the stretching vibration of the C=C bond and is located at 1636  $\text{cm}^{-1}$ . The band at 1606  $\text{cm}^{-1}$  is associated with the stretching vibration of the C=C bonds in dihydroxyphenyl and hydroxyphenyl group. Above 3400  $\text{cm}^{-1}$  is observed the band related to the stretching vibration of the O-H bond. In lower frequencies below 1000  $\text{cm}^{-1}$  are mainly located the bands related to the deformation (rocking, breathing) of all molecule and vibration out of plane C-H bonds.
